# Supplementary material for: Evolutionary Pressure on Mitochondrial Cytochrome b Is Consistent with a Role of CytbI7T Affecting Longevity during Caloric Restriction
Source: PLoS One. 2009 Jun 8;4(6):e5836. doi: 10.1371/journal.pone.0005836 (PMC2688749; doi:10.1371/journal.pone.0005836)
Supplement: Table S1 — The GenBank accession numbers for the 107 mammalian cytb sequences used in this study. (0.03 MB XLS) [file pone.0005836.s002.xls]

## Sheet: Sheet1
Common Name	Genus	Species	GI Number
Aardvark	Orycteropus	afer	5835764
African Savanna Elephant	Loxodonta	africana	6137801
Alpaca	Lama	pacos	9755345
American Black Bear	Ursus	americanus	19343488
American Pika	Ochotona	princeps	41353095
Asiatic Elephant	Elephas	maximus	37595787
Atlantic Walrus	Odobenus	rosmarus	34577125
Australian Echidna	Tachyglossus	aculeatus	18077882
Baird's Beaked Whale	Berardius	bairdii	38707598
Barbary Ape	Macaca	sylvanus	14010693
Black Muntjac	Muntiacus	crinifrons	28867217
Blue Whale	Balaenoptera	musculus	5834995
Boutu	Inia	geoffrensis	38707450
Bowhead Whale	Balaena	mysticetus	38707506
Brazilian Tapir	Tapirus	terrestris	37595801
Brown Bear	Ursus	arctos	19343502
Cape Golden Mole	Chrysochloris	asiatica	32402539
Cape Rock Hyrax	Procavia	capensis	32402525
Cat	Felis	catus	5835205
Cheetah	Acinonyx	jubatus	38349475
Chilean Shrew Opossum	Rhyncholestes	raphanurus	45685677
Chimpanzee	Pan	troglodytes	5835121
Chinese Muntjac	Muntiacus	reevesi	21908045
Collared Pika	Ochotona	collaris	15055558
Common Gibbon	Hylobates	lar	5835820
Common Wombat	Vombatus	ursinus	18077896
Cow	Bos	taurus	5834939
Dog	Canis	familiaris	17737322
Domestic Guinea Pig	Cavia	porcellus	5835988
Donkey	Equus	asinus	5835345
Dugong	Dugong	dugon	17981678
Ehrenberg's Mole Rat	Nannospalax	ehrenbergi	40805109
Elegant Fat-tailed Opossum	Thylamys	elegans	45685705
Elephant Shrew	Elephantulus	sp.VB001	32402553
Eurasian Red Squirrel	Sciurus	vulgaris	8573078
European Hare	Lepus	europeaus	21492444
European Mole	Talpa	europaea	7212513
Fat DorMouse	Myoxus	glis	5835484
Finback Whale	Balaenoptera	physalus	5819095
Formosan Lesser Horseshoe Bat	Rhinolophus	monoceros	42717961
Franciscana	Pontoporia	blainvillei	38707584
Goat	Capra	hircus	33285125
Gorilla	Gorilla	gorilla	5835149
Gray Seal	Halichoerus	grypus	5835009
Greater Cane Rat	Thryonmys	swinderianus	12667705
Greater Indian Rhinoceros	Rhinoceros	unicornis	5835331
Grey Whale	Eschrichtius	robustus	38707478
Hamadryas Baboon	Papio	hamadryas	5835638
Harbor Porpoise	Phocoena	phocoena	38707464
Harbor Seal	Phoca	vitulina	5834857
Hippopotamus	Hippopotamus	amphibius	5836030
Horse	Equus	caballus	5835107
House Mouse	Mus	musculus	34538597
Human	Homo	sapiens	17981852
Indus River Dolphin	Platanista	minor	38707626
Jamaican Fruit-eating Bat	Artibeus	jamaicensis	5835666
Japenese House Bat	Pipistrellus	abramus	42632257
Japenese Mole	Mogera	wogura	32526814
Japenese Shrew Mole	Urotrichus	talpoides	32526828
Lesser Egyptian Jerboa	Jaculus	jaculus	40805123
Little Red Flying Fox	Pteropus	scapulatus	11602891
Long-clawed Shrew	Sorex	unguiculatus	42632229
Long-eared Hedgehog	Hemiechinus	auritus	32526842
Long-tailed Pangolin	Manis	tetradactyla	21449973
Malayan Flying Lemur	Cynocephalus	variegatus	21449889
Minke Whale	Baleanoptera	acutorostrata	38707492
Monito DelMonte	Dromiciops	gliroides	45685691
Moonrat	Echinosorex	gymnura	14530815
Muntjac	Muntiacus	muntjak	28301754
Narwhal	Monodon	monoceros	38707570
New Zealand Fur Seal	Arctocephalus	forsteri	21449916
New Zealand Long-tailed Bat	Chalinolobus	tuberculatus	11610804
Nine-banded Armadillo	Dasypus	novemcinctus	5835429
North American Opossum	Didelphis	virginiana	5835037
Norther Brown Bandicoot	Isoodon	macrourus	13786588
Northern Bottlenose Whale	Hyperoodon	ampullatus	38707612
Northern Tree Shrew	Tupaia	belangeri	9997000
Norway Rat	Rattus	norvegicus	5835177
Okinawa Least Horseshoe Bat	Rhinolophus	pumilus	42632271
Orangutan	Pongo	pygmaeus	5835163
Pig	Sus	scrofa	5835862
Platypus	Ornithorhyncus	anatinus	5836058
Polar Bear	Ursus	maritimus	19343516
Pygmy Chimpanzee	Pan	paniscus	5835135
Pygmy Right Whale	Caperea	marginata	38707520
Pygmy Sperm Whale	Kogia	breviceps	38707548
Rabbit	Oryctolagus	cuniculus	5835526
Ring-tailed Lemur	Lemur	catta	21449875
Ryuku Flying Fox	Pteropus	dasymallus	11386118
Sheep	Ovis	aries	5835554
Short-eared Elephant	Macroscelides	proboscideus	21449903
Silky Shrew Opossum	Caenolestes	fuliginosus	45685994
Silver-gray Brushtail Possum	Trichosurus	vulpecula	15079189
Slow Loris	Nycticebus	Coucang	14010665
Small Madagascar Hedgehog	Echinops	telfairi	34582602
Southern Tamandua	Tamandua	tetradactyla	21449946
Sperm Whale	Physeter	catadon	34582601
Steller Sea Lion	Eumetopias	jubatus	34577124
Sumatran Orangutan	Pongo	pygmaeusabelii	5835834
Taiwan Brown-toothed Shrew	Episoriculus	fumidus	15079203
Taiwan Vole	Volemys	kikuchii	15079217
Wallaroo	Macropus	robustus	5835359
Western European Hedgehog	Erinaceus	europaeus	5835792
Western Tarsier	Tarsius	bancanus	14602225
White Rhinoceros	Ceratotherium	simum	5835401
White-beaked Dolphin	Lagenorhynchus	albirostris	38707534
White-fronted Capuchin	Cebus	albifrons	14010679
